**Conclusions:** We identified clinical and genetic markers associated with infliximab response in patients with IBD. Our findings could provide insights to maximise the efficacy of infliximab therapy in IBD.

**References**

1. Sprakes MB, Ford AC, Warren L, *et al.* Efficacy, tolerability, and predictors of response to infliximab therapy for Crohn's disease: a large single centre experience. *J Crohns Colitis* 2012;6:143–53.  
2. Hanauer SB, Feagan BG, Lichtenstein GR, *et al.* Maintenance infliximab for Crohn's disease: the accent I randomised trial. *Lancet* 2002;359:1541–9.  
3. Ford AC, Sandborn WJ, Khan KJ, *et al.* Efficacy of biological therapies in inflammatory bowel disease: systematic review and meta-analysis. *Am J Gastroenterol* 2011;106:644–59.  
4. Ben-Horin S, Chowers Y. Review article: loss of response to anti-TNF treatments in Crohn's disease. *Aliment Pharmacol Ther* 2011;33:987–95.

**DOP56**  
**Dashboard driven vs. conventional dosing of infliximab in inflammatory bowel disease patients: the PRECISION trial**

A. Strik<sup>\*1,2</sup>, S. Berends<sup>3</sup>, D. Mould<sup>4</sup>, R. Mathôt<sup>3</sup>, C. Ponsioen<sup>2</sup>, J. van den Brande<sup>5</sup>, J. Jansen<sup>6</sup>, D. Hoekman<sup>7</sup>, J. Brandse<sup>8</sup>, M. Löwenberg<sup>2</sup>, G. D'Haens<sup>2</sup>  
<sup>1</sup>Academic Medical Center, Gastroenterology and Hepatology, Amsterdam, The Netherlands, <sup>2</sup>Amsterdam UMC, location AMC, Gastroenterology and Hepatology, Amsterdam, The Netherlands, <sup>3</sup>Amsterdam UMC, Location AMC, Hospital Pharmacy, Amsterdam, The Netherlands, <sup>4</sup>Projections Research Inc., Phoenixville, USA, <sup>5</sup>Tergooi Hospital, Blaricum, The Netherlands, <sup>6</sup>Onze Lieve Vrouwe Gasthuis, Gastroenterology and Hepatology, Amsterdam, The Netherlands, <sup>7</sup>Amsterdam UMC, location AMC, Clinical Genetics, Amsterdam, The Netherlands, <sup>8</sup>Amsterdam UMC, location VUmc, Gastroenterology and Hepatology, Amsterdam, The Netherlands

**Background:** Loss of response to infliximab (IFX) complicates the management of inflammatory bowel disease (IBD). Up to date, no prospective study has demonstrated the benefit of proactive dose adjustment based on serum IFX levels. However, more personalised dosing strategies using a dashboard to achieve and maintain well-defined IFX target trough levels (TLs) may prevent loss of response. The aim of the PRECISION trial was to investigate the efficacy of dashboard-driven IFX dosing in IBD patients during 1 year.  
**Methods:** In this multi-centre 1:1 randomised prospective trial, patients in clinical remission (Harvey–Bradshaw Index [HBI] ≤4 for Crohn’s disease [CD] or partial mayo score [PM] ≤2 for ulcerative colitis [UC]) receiving IFX maintenance treatment were included. Patients in the precision dosing group (PG) received IFX dosing guided by a Bayesian pharmacokinetic model, aiming to achieve and maintain an IFX TL of 3 µg/ml by treatment (de-)escalation as indicated by the dashboard.<sup>1</sup> Patients in the control group (CG) continued IFX treatment regimen given prior to randomisation without dose adaptation. Biochemical remission was defined as a faecal calprotectin <250 µg/g and CRP < 0.5 mg/l. Clinical loss of response was defined as an HBI >4 or PM score >2 at two consecutive visits.  
**Results:** In total, 80 patients were included (66 CD and 14 UC). Baseline characteristics are listed in Table 1.

| Characteristic                        | PG (N = 40)   | CG (N = 40)   |
|---------------------------------------|---------------|---------------|
| IFX treatment duration in years [IQR] | 3.5 (2–7.8)   | 4.0 (1.3–5.8) |
| Serum CRP mg/l [IQR]                  | 2.0 (0.9–5.3) | 2.1 (1.0–6.5) |
| Serum TL µg/ml [IQR]                  | 3.7 (1.6–6.4) | 3.0 (1.9–5.2) |
| Serum albumin g/l [IQR]               | 43 (41–45)    | 42 (40–45)    |
| Biochemical remission, n (%)          | 25 (62.5)     | 22 (55)       |
| Standard IFX treatment regimen        | 25 (62.5)     | 23 (57.5)     |
| Intensified IFX treatment regimen     | 11 (27.5)     | 13 (32.5)     |
| De-intensified IFX treatment regimen  | 4 (10)        | 4 (10)        |
| Combination therapy with IM           | 15 (37.5)     | 17 (42.5)     |

Baseline patient characteristics per treatment group. Values are median (interquartile range). IM, immunomodulator (thiopurine or methotrexate). Per protocol analysis showed loss of clinical response in 14/39 (36%) patients in the CG compared with 4/32 (13%) patients in the PG (*p* = 0.03). Three patients (7.5%) in the PG were considered failures because of re-opening of their perianal fistula after dose de-escalation to achieve a TL of 3 µg/ml. Time to relapse was evaluated using Kaplan–Meier analysis (Figure 1).

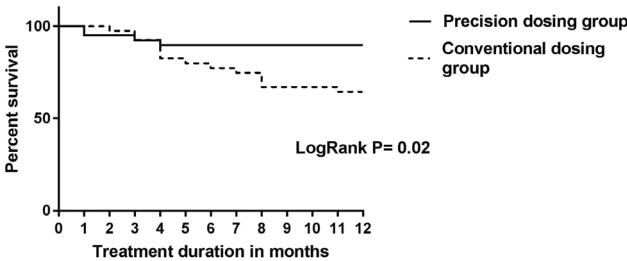

**Figure 1.** Kaplan–Meier  
**Conclusions:** The PRECISION study is the first prospective trial demonstrating a clinical benefit from personalised dosing in IBD patients. Dashboard-guided dosing resulted in a significant higher proportion of patients who maintained clinical remission during 1 year of treatment compared with patients that continued treatment without proactive adjustments. In patients with perianal disease, de-escalating treatment to obtain an IFX TL of 3 µg/ml resulted in re-opening of their old fistula, suggesting that, in these patients, higher TLs are needed for disease control.  
**Reference**  
1. Xu Z, Mould DR, Hu C, Ford J, Keen M, Davis HM, Zhou H. Population Pharmacokinetic Analysis of Infliximab in Pediatrics Using Integrated Data from Six Clinical Trials Abstract 139760 Clin Pharmacol Drug Dev. 2012 1(4); 203.

**DOP57**  
**Monitoring response to anti-TNF therapy in ulcerative colitis patients by gastrointestinal ultrasound: sub-analysis from TRUST&UC**

C. Maaser<sup>\*1</sup>, F. Petersen<sup>1</sup>, U. Helwig<sup>2</sup>, I. Fischer<sup>3</sup>, S. Rath<sup>4</sup>, S. Kolterer<sup>4</sup>, D. Lang<sup>4</sup>, T. Kucharzik<sup>1</sup>  
<sup>1</sup>University Teaching Hospital Lueneburg, Department of Internal Medicine and Gastroenterology, Lueneburg, Germany, <sup>2</sup>Gastroenterology Practice, Oldenburg, Germany, <sup>3</sup>Biostatistik Tuebingen, Tuebingen, Germany, <sup>4</sup>AbbVie Deutschland GmbH & Co.KG, Medical Department Gastroenterology, Wiesbaden, Germany  
**Background:** In ulcerative colitis GIUS (GastroIntestinal UltraSound) is discussed to be a reliable surrogate parameter for inflammatory activity next to faecal calprotectin (FC), and to some extend
